# Supplementary material
Source: publisher figshare collection journal article supplement (https://future-science-group.figshare.com/articles/dataset/_/23267066)
Supplement: Supplementary file 1 [file 1]

**Table S2.** Summary table of biofilm inhibition and eradication. + means statistically significant; - no significant difference with the control biofilm. Inhibition/eradication.

|  | AuT1 | | | AuT2 | | | Ag | | | ZnO:MgO | | |
| --- | --- | --- | --- | --- | --- | --- | --- | --- | --- | --- | --- | --- |
|  | *1.5x* | *1x* | *0.5x* | *1.5x* | *1x* | *0.5x* | *1.5x* | *1x* | *0.5x* | *1.5x* | *1x* | *0.5x* |
| *E. coli* | +/- | +/- | +/- | +/- | +/- | +/- | +/+ | +/+ | +/+ | +/+ | +/- | +/- |
| *P. mirabilis* | +/- | +/- | +/- | +/- | +/+ | -/+ | +/- | +/+ | +/- | +/- | +/- | +/- |
| *S. aureus* | -/- | -/- | -/- | +/- | -/- | -/- | -/- | +/- | +/- | -/- | -/- | +/- |
| *A. baumannii* | +/+ | -/+ | -/- | +/+ | -/+ | -/+ | +/+ | +/+ | +/+ | +/+ | +/+ | +/- |
| *P. aeruginosa* | +/- | -/- | -/- | +/- | -/- | -/- | -/- | -/- | -/- | -/- | -/- | -/- |
